# Supplementary material for: A reduction-responsive polypeptide nanogel encapsulating NIR photosensitizer for imaging guided photodynamic therapy
Source: Royal Society of Chemistry journal article supplement (doi:10.1039/c5py01629k), 2015-11-25
Supplement: c5py01629k1.pdf [file c5py01629k1.pdf]

Supporting materials for:

## Reduction-responsive Polypeptide Nanogel Encapsulating NIR Photosensitizer for Imaging Guided Photodynamic Therapy

Titao Jing, Lifeng Yan\* , Liyi Fu, Le Liu

CAS Key Laboratory of Soft Matter Chemistry, Hefei National Laboratory for Physical Sciences at the  
Microscale, and National Synchrotron Radiation Laboratory, iChEM, University of Science and  
Technology of China. Jinzai Road 96#, Hefei, 230026, Anhui, P.R.China

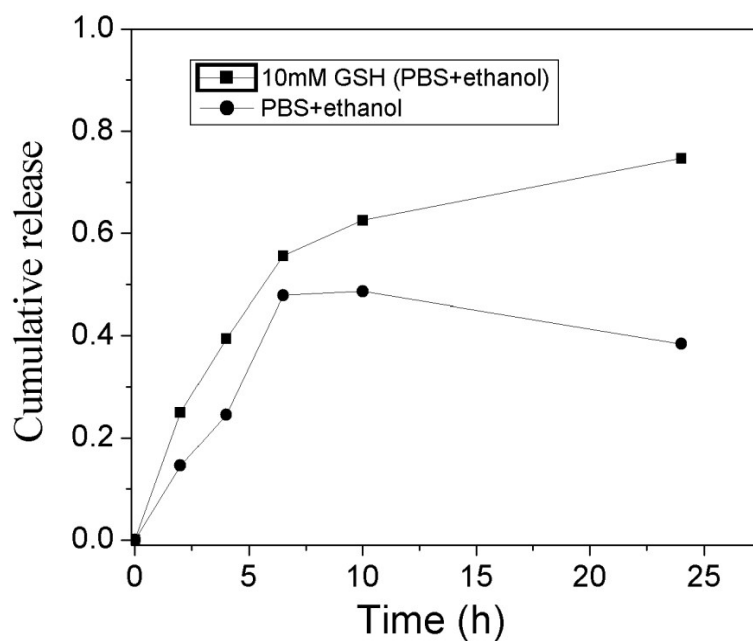

Figure S1: Accumulative release of Br<sub>2</sub>-808 from cyanine-loaded nanogel in mixture of PBS and ethanol in or not the presence of 10 mM GSH.

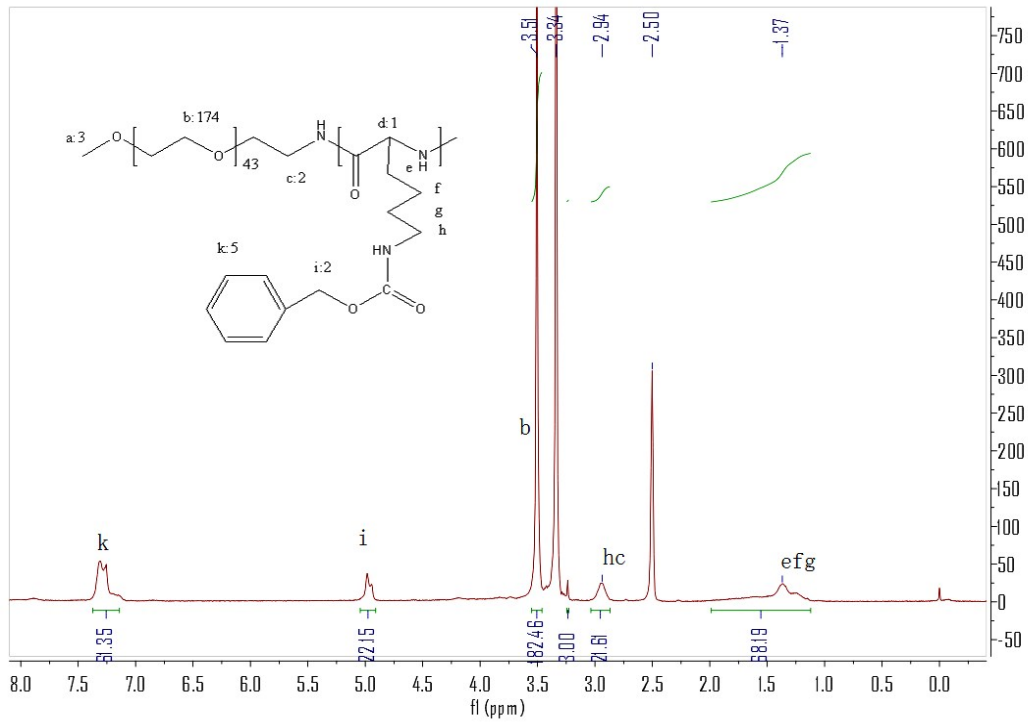

Figure S2. <sup>1</sup>H-NMR spectrum of PEG-PZLL

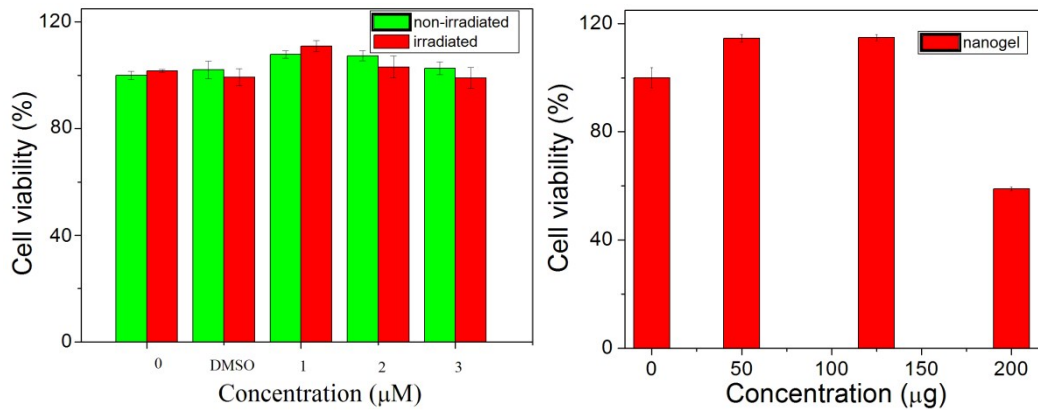

Figure S3. Cell viability of free cyanine contained 0.1% DMSO under dark or light and nanogel.

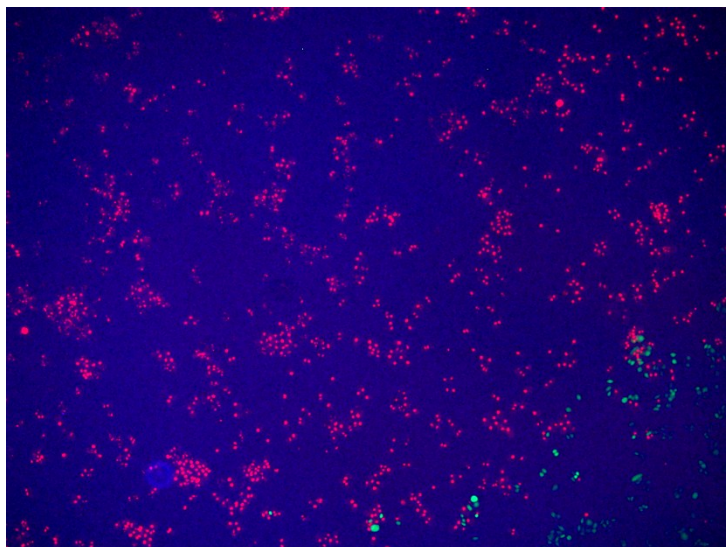

Figure S4: FDA/PI live/dead staining of cell incubated with cyanine-loaded nanogel under irradiated condition.
